# Supplementary material for: Cross-talk between the ER pathway and the lncRNA MAFG-AS1/miR-339-5p/ CDK2 axis promotes progression of ER+ breast cancer and confers tamoxifen resistance
Source: Aging (Albany NY). 2020 Oct 24;12(20):20658–83. doi: 10.18632/aging.103966 (PMC7655217; doi:10.18632/aging.103966)
Supplement: Supplementary Table 1 [file aging-12-103966-s002..xlsx]

## Sheet: Sheet1
Supplementary Table 1. The list of 37 lncRNAs contained HR-values and p-values.
	SYMB	hratio_os	hratio.se_os	lower_os	upper_os	rank_os	hratio_rfs	hratio.se_rfs	lower_rfs	upper_rfs	rank_rfs	rank_aver	p-value	rank
1969	TMPO-AS1	1.37358	0.136557	1.10593	1.64122	3061	1.25688	0.130874	1.00037	1.51339	2665	0.000349284	0.000349	70
993	LINC00161	1.28909	0.113619	1.0664	1.51178	3370	1.2284	0.0836538	1.06444	1.39236	2351	0.000349589	0.00035	72
1000	LINC00589	1.29405	0.126556	1.04601	1.5421	3497	1.31761	0.117628	1.08707	1.54816	2191	0.000351617	0.000352	79
826	HOTAIR	1.33325	0.12699	1.08435	1.58214	3232	1.32328	0.118103	1.0918	1.55475	2155	0.000371264	0.000371	146
218	C5orf66-AS1	1.33717	0.135759	1.07109	1.60325	3328	1.34633	0.122017	1.10718	1.58547	2039	0.000372648	0.000373	152
964	KRTAP5-AS1	1.36415	0.143205	1.08348	1.64483	3242	1.36068	0.133973	1.09809	1.62326	2117	0.000373204	0.000373	155
1003	LINC00862	1.34925	0.132322	1.0899	1.60859	3193	1.34488	0.122657	1.10447	1.58528	2056	0.000381025	0.000381	176
4	AATBC	1.40087	0.136375	1.13358	1.66816	2850	1.35381	0.127477	1.10396	1.60366	2061	0.000407249	0.000407	274
1011	LINC01206	1.42146	0.12866	1.16929	1.67363	2530	1.30296	0.118943	1.06984	1.53608	2317	0.000412626	0.000413	292
1702	SBF2-AS1	1.43779	0.137557	1.16818	1.7074	2546	1.33623	0.128264	1.08483	1.58762	2206	0.000420875	0.000421	315
1018	LINC01500	1.43014	0.13937	1.15698	1.7033	2646	1.36377	0.132608	1.10387	1.62368	2062	0.000424809	0.000425	328
503	DKFZP434H168	1.43658	0.136292	1.16945	1.7037	2528	1.35068	0.122688	1.11022	1.59114	2025	0.000439271	0.000439	379
1017	LINC01494	1.44923	0.143612	1.16776	1.7307	2549	1.37695	0.131326	1.11956	1.63435	1954	0.000444148	0.000444	402
379	CLYBL-AS2	1.48901	0.151073	1.19291	1.7851	2320	1.37872	0.139951	1.10443	1.65302	2057	0.000456934	0.000457	431
1453	PLA2G4E-AS1	1.46354	0.139659	1.18981	1.73726	2350	1.37346	0.133446	1.11191	1.63501	2010	0.000458716	0.000459	436
692	FOXP4-AS1	1.47881	0.129345	1.2253	1.73233	2025	1.30716	0.118175	1.07555	1.53878	2272	0.000465441	0.000465	461
159	BCDIN3D-AS1	1.35795	0.142946	1.07779	1.63812	3277	1.50564	0.133208	1.24456	1.76673	1005	0.000467071	0.000467	465
1123	MAFG-AS1	1.44892	0.146886	1.16103	1.73681	2610	1.43298	0.141661	1.15533	1.71063	1649	0.000469594	0.00047	473
996	LINC00294	1.49451	0.136954	1.22609	1.76294	2013	1.36793	0.130149	1.11284	1.62302	2002	0.000498132	0.000498	556
1010	LINC01204	1.38055	0.145064	1.09623	1.66487	3137	1.53479	0.136094	1.26806	1.80153	840	0.000502892	0.000503	571
459	DAB1-AS1	1.44001	0.120972	1.20291	1.67711	2236	1.37652	0.112685	1.15566	1.59738	1646	0.000515198	0.000515	611
686	FOXD2-AS1	1.44297	0.125817	1.19637	1.68957	2293	1.39952	0.121324	1.16173	1.63731	1588	0.000515331	0.000515	613
1736	SHANK2-AS3	1.54509	0.138958	1.27274	1.81744	1617	1.33458	0.131403	1.07704	1.59213	2263	0.000515464	0.000515	614
1022	LINC01842	1.55158	0.148115	1.26129	1.84188	1707	1.36849	0.138906	1.09624	1.64074	2130	0.000521241	0.000521	636
992	LINC00102	1.44172	0.150325	1.14709	1.73635	2738	1.50101	0.136655	1.23317	1.76884	1065	0.000525901	0.000526	646
2119	YTHDF3-AS1	1.49097	0.145241	1.2063	1.77563	2200	1.43663	0.137924	1.16631	1.70696	1550	0.000533333	0.000533	667
1001	LINC00592	1.43732	0.109326	1.22304	1.65159	2046	1.35713	0.105889	1.14959	1.56467	1699	0.000534045	0.000534	668
1024	LINC02081	1.30755	0.135049	1.04286	1.57224	3516	1.73309	0.135718	1.46709	1.9991	200	0.000538213	0.000538	679
129	ATP2A1-AS1	1.58029	0.141444	1.30307	1.85752	1390	1.37874	0.138552	1.10719	1.6503	2038	0.000583431	0.000583	768
1014	LINC01315	1.57421	0.141788	1.29631	1.8521	1429	1.3859	0.137899	1.11562	1.65617	1980	0.000586682	0.000587	773
1026	LINC02239	1.52385	0.140039	1.24938	1.79832	1808	1.43372	0.134391	1.17032	1.69712	1516	0.000601685	0.000602	806
656	FENDRR	1.57094	0.143183	1.2903	1.85157	1482	1.41269	0.138185	1.14185	1.68353	1784	0.00061237	0.000612	836
531	DPP10-AS1	1.4786	0.113525	1.25609	1.7011	1744	1.39603	0.108831	1.18272	1.60933	1423	0.000631512	0.000632	874
889	JHDM1D-AS1	1.59939	0.139673	1.32563	1.87314	1225	1.39988	0.13245	1.14028	1.65948	1793	0.000662691	0.000663	929
1002	LINC00687	1.64725	0.149845	1.35356	1.94094	1058	1.40187	0.14055	1.1264	1.67735	1914	0.000672948	0.000673	949
1025	LINC02170	1.42868	0.112971	1.20726	1.6501	2191	1.51189	0.113485	1.28947	1.73432	734	0.000683761	0.000684	973
1015	LINC01352	1.55509	0.138191	1.28424	1.82594	1539	1.46106	0.136077	1.19436	1.72777	1320	0.000699545	0.0007	996
