# Supplementary material for: Cross-talk between the ER pathway and the lncRNA MAFG-AS1/miR-339-5p/ CDK2 axis promotes progression of ER+ breast cancer and confers tamoxifen resistance
Source: Aging (Albany NY). 2020 Oct 24;12(20):20658–83. doi: 10.18632/aging.103966 (PMC7655217; doi:10.18632/aging.103966)
Supplement: Supplementary Table 2 [file aging-12-103966-s003..xlsx]

## Sheet: Sheet1
Supplementary Table 2. The microRNAs interact with MAFG-AS1 in starBase v2.0.
name	mirAccession	geneName	targetSites	bioComplex	clipReadNum	cancerNum
hsa-miR-339-5p	MIMAT0000764	MAFG-AS1	1	1	9	-1
